# Supplementary material for: Longitudinal network-based factorization identifies the altered trajectory of motor symptoms in Parkinson's Disease
Source: Research Square preprint supplement (doi:10.21203/rs.3.rs-6562209/v1), 2025-05-06
Supplement: Supplementary file 1 [file dbd386a790e7f89306ec8a4b.docx]

**Supplyment material**

Figure S1:
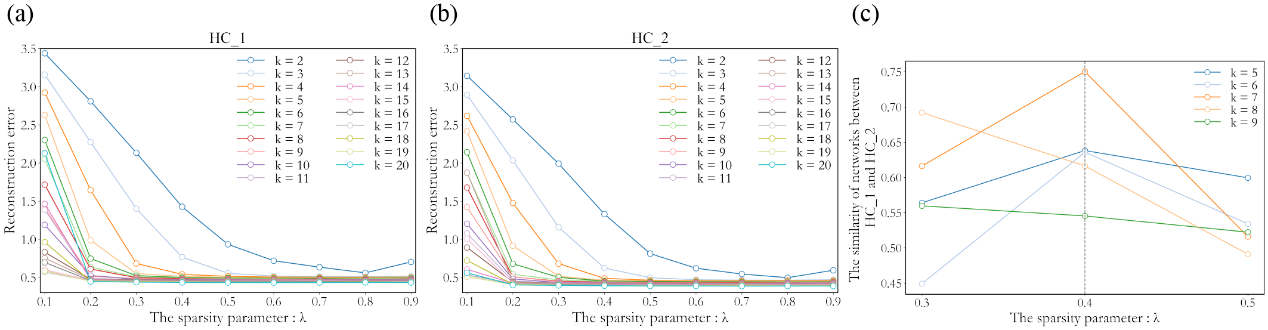


Reconstruction error across varying numbers of decompositions (K: 2-20) and sparsity values (λ: 0.1~0.9) in both the HC_1 and HC_2 datasets: (a) Reconstruction error of HC_1; (b) Reconstruction error of HC_2; (c) The average similarity of the decomposition factors between the HC_1 and HC_2

Figure S2:


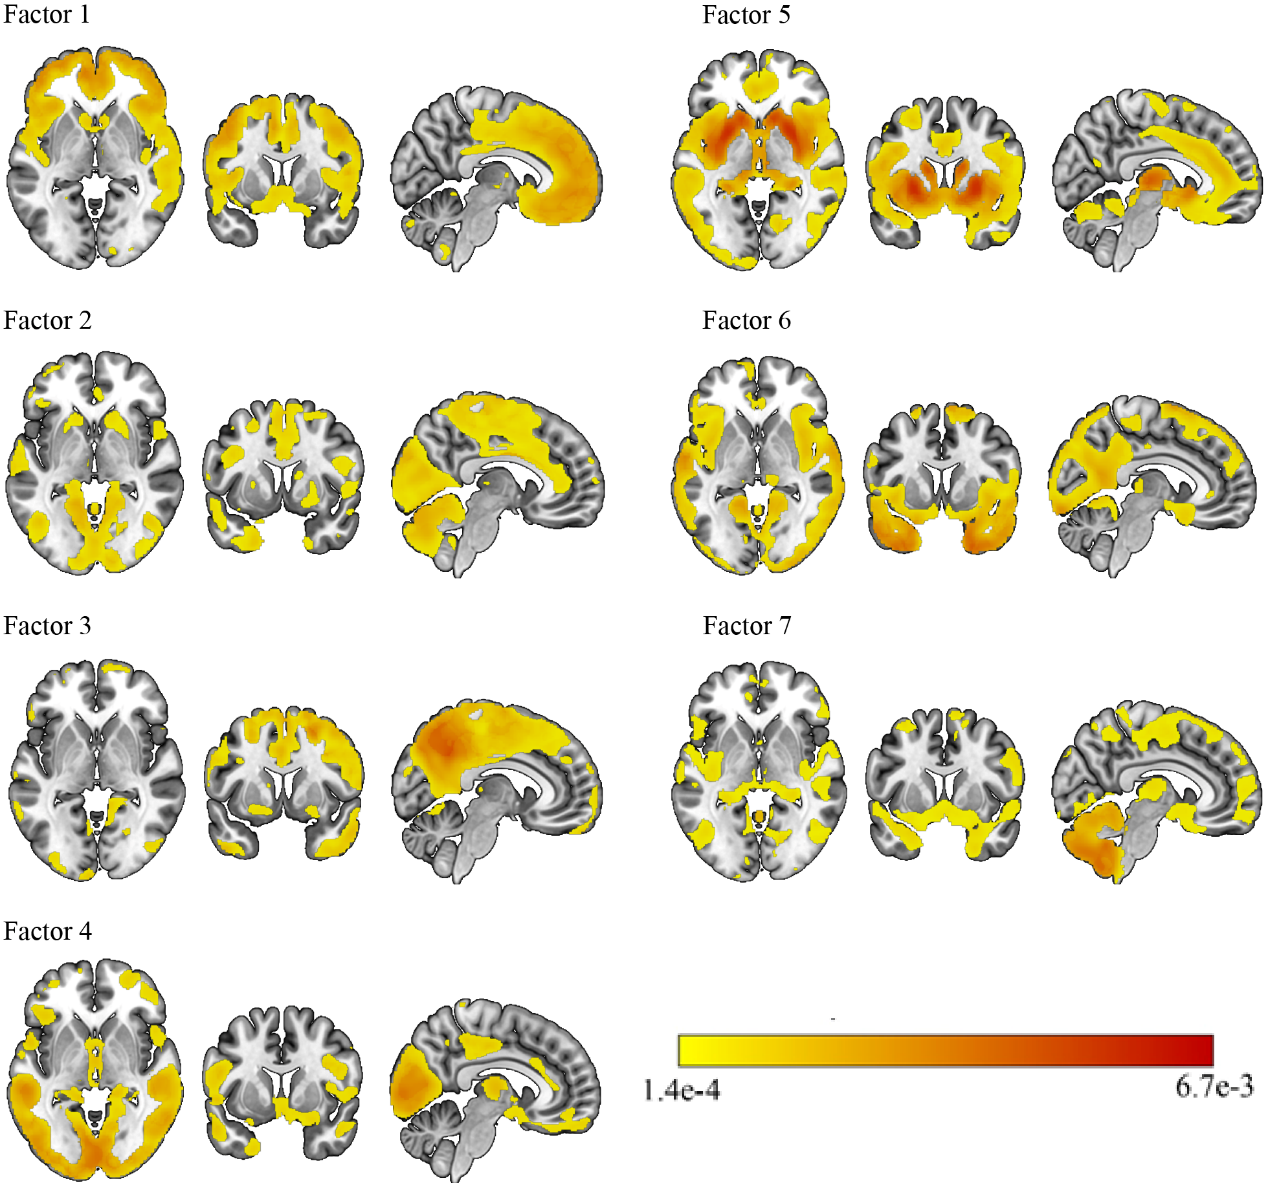


Decomposed results of HC_2 under the same parameters (k=7, λ=0.4)
